# Supplementary material for: A Solvent-Free Approach to Crosslinked Hydrophobic Polymeric Coatings on Paper Using Vegetable Oil
Source: MDPI journal article supplement (doi:10.3390/polym14091773), 2022-04-27
Supplement: s1 [file s1]

## Supporting information

# A solvent-free approach to crosslinked hydrophobic polymeric coatings on paper using vegetable oil

Amelia Loesch-Zhang, Cynthia Cordt, Andreas Geissler and Markus Biesalski

Table S1: Attribution of IR spectral bands of oleic acid/thiol mixture to functional groups.<sup>[23]</sup>

| Wavenumber (cm <sup>-1</sup> ) | Functional group                                          |
|--------------------------------|-----------------------------------------------------------|
| 3005                           | H-C <sub>=cis</sub>                                       |
| 2957                           | CH <sub>3</sub>                                           |
| 2924                           | CH <sub>2</sub>                                           |
| 2852                           | CH <sub>2</sub>                                           |
| 1709                           | C=O                                                       |
| 1462                           | CH <sub>2</sub>                                           |
| 1434                           | CH <sub>3</sub>                                           |
| 1412                           | H-C <sub>=cis</sub>                                       |
| 1378                           | CH <sub>3</sub>                                           |
| 1343                           | O-H                                                       |
| 1283, 1246                     | CH <sub>2</sub>                                           |
| 1118                           | -C-O (ester)                                              |
| 1091                           | -C-O (ester)                                              |
| 998                            | C=C <sub>conj</sub> * <sup>[20]</sup>                     |
| 967                            | C=C <sub>trans</sub> *                                    |
| 934                            | C=C <sub>cis</sub>                                        |
| 723                            | C=C <sub>cis</sub> and -(CH <sub>2</sub> ) <sub>n</sub> - |

\*only observed after crosslinking

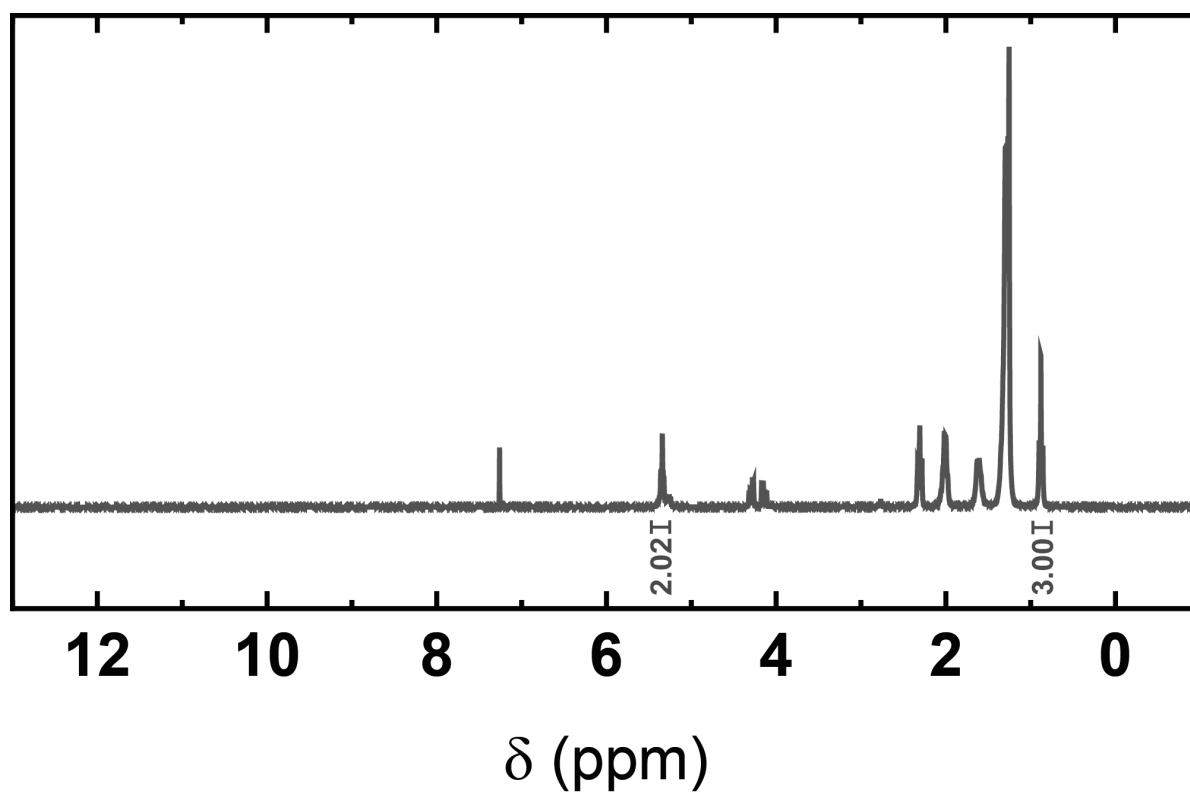

Figure S1:  $^1\text{H}$ -NMR spectrum of olive oil.

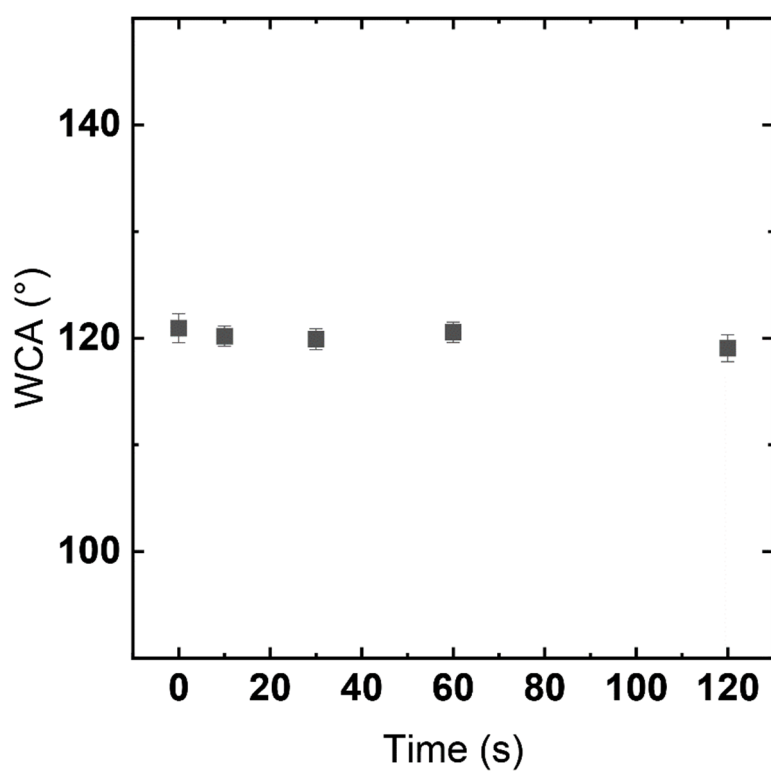

Figure S2: Time-dependent evolution of contact angles on cotton linters paper coated with crosslinked olive oil/1,8-ODT mixture.
